# Supplementary material for: Spatiotemporally resolved emissions and concentrations of styrene, benzene, toluene, ethylbenzene, and xylenes (SBTEX) in the US Gulf region
Source: Copernicus journal article supplement (doi:10.5194/essd-15-5261-2023), 2023-11-28
Supplement: Supplementary file 1 [file essd-15-5261-2023-supplement.pdf]

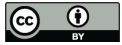

*Supplement of*

## **Spatiotemporally resolved emissions and concentrations of styrene, benzene, toluene, ethylbenzene, and xylenes (SBTEX) in the US Gulf region**

**Chi-Tsan Wang et al.**

*Correspondence to:* Bok H. Baek (bhbaek@gmail.com)

The copyright of individual parts of the supplement might differ from the article licence.

## 1 **Supplementary document:**

### 3 **S1. Emission Data**

4 We applied the USEPA’s 2011 National Emission Inventory (NEI) Emissions Modeling Platform  
5 (EMP) version 6 (USEPA, 2021b), based on the official 2011 NEI with the SMOKE model system  
6 to generate the year 2012 gridded hourly emissions for the CAMx modeling. The following  
7 emission source types were processed: 1) area, 2) point, 3) mobile, and 4) biogenic source types.  
8 The area emission sources included the following emission sectors: fugitive dust (afdust),  
9 commercial marine vessels (cmv), non-point source oil and gas industry (np\_oilgas), rail,  
10 agriculture (ag), agriculture fire (agfire), non-point (nonpt), and nonroad. The stationary point  
11 sources included stationary point electric generating units (ptegu), point source fire or wildfire  
12 (ptfire), point source from non-electric generating unit point source (ptnonipm, which include most  
13 industrial processes but exclude the “egu” and “oilgas” industry), and point source oil and gas  
14 (pt\_oilgas) sectors. The details of these emission sectors can be found in the technical supporting  
15 document (TSD) from the 2011 NEI EMP (USEPA, 2021b). The SBTEX emission from original  
16 NEI are shown in Table S1.

17 The official USEPA’s NEI reported the county-level annual or monthly total emissions of criteria  
18 air pollutants (CAPs), including carbon monoxide (CO), nitrogen dioxide (NO<sub>x</sub>), sulfur dioxide  
19 (SO<sub>2</sub>), particulate matter (PM), and VOC. The SMOKE model system processed these county  
20 total emissions inventories and generated the spatially gridded and chemically speciated hourly  
21 emission data of model species for the CTM. In this study, the reduced chemical mechanism,  
22 Carbon Bond 06 revision 4 (CB6r4) (Yarwood and Jung, 2010), is applied to simulate the  
23 chemistry process. The CB6 mechanism uses 22 surrogate VOC species to represent all VOC-  
24 related compounds in the atmosphere (Ramboll, 2020b), such as aldehyde (ALDX), formaldehyde  
25 (FORM), acetone (ACET), methane (CH<sub>4</sub>), methanol (MEOH), benzene (BENZ), and others.  
26 Thus, the CTM employs these surrogate model species and reduced chemical mechanisms to  
27 simulate the radical cycle reactions of HO<sub>x</sub> (OH and HO<sub>2</sub>) and NO<sub>x</sub> (NO and NO<sub>2</sub>), the ozone  
28 formation process, and other secondary air pollutants like PM<sub>2.5</sub> (Steyn and Rao, 2010).

29 According to the USEPA SPECIATE database documents (Simon et al., 2010; USEPA, 2021a)  
30 and the chemical speciation tool (Ramboll, 2020b), the CB6 model species like TOL and XYL  
31 can be derived from the explicit SBTEX chemical species; however, they are not limited to SBTEX.  
32 In fact, hundreds of real VOC species similar in chemical structure to toluene and xylene are  
33 included in the surrogate species, TOL and XYL (Ramboll, 2020b). Thus, the model species can  
34 not represent the explicit xylenes and toluene chemical compounds while they share the names of  
35 these species in the CTM model.

36

## 37 **S2. Air Quality Modeling**

38 The Comprehensive Air Quality Model with Extensions version 7.0, CAMx7.0 (RAMBOLL 2020)  
39 was implemented in this study to predict the SBTEX concentrations in the atmosphere. The base  
40 model simulation period is from April 20<sup>th</sup> to September 30<sup>th</sup>, 2012 (April 20<sup>th</sup> to April 30<sup>th</sup> are  
41 spin-up dates). The evaluated meteorological data from WRF version 3.8 over the U.S. continental  
42 region are provided by the USEPA Support Center for Regulatory Atmospheric Modeling  
43 (SCRAM) (USEPA, 2022). They are converted to the CAMx-ready format using the WRFCAMx  
44 version 4.8.1 program developed by the CAMx development team (RAMBOLL, 2020a). The  
45 photodissociation coefficients are calculated by the Tropospheric Ultraviolet-Visible (TUV)  
46 Radiation Model (Madronich, 1987) with Ozone Monitoring Instrument (OMI) daily data (NASA,  
47 2021). The USEPA daily hemisphere CMAQ model results are used to calculate the boundary  
48 condition and initial condition (Hogrefe et al., 2021). The chemical mechanism is Carbon Bond  
49 06 revision 4 (CB6r4) (Ramboll, 2020b). Figure 1 in manuscript shows that the main model  
50 domain is 12 km × 12 km (blue rectangle), with flexi-nesting to 4 km × 4 km (red rectangle).

51 To accurately simulate the decay of individual SBTEX, the base CAMx modeling results are  
52 immediately processed through the reactive tracer (RTRAC) probing tool step in CAMx. The base  
53 model predicted hourly oxidant concentrations, such as ozone (O<sub>3</sub>), hydroxyl radical (OH), and  
54 nitrate radical (NO<sub>3</sub>); those hourly oxidant concentrations and dry/wet depositions were used to  
55 estimate the decay of SBTEX concentrations. Thus, it is critical to confirm that the CAMx model  
56 can reasonably represent the oxidants concentrations in the base modeling run. The CAMx  
57 predictions are statistically evaluated with the 87 ozone monitoring sites data in the 4 km × 4 km

58 model domain. The base modeling ozone evaluation results over the simulation period are shown  
59 in Table S2. The evaluation indicators followed the USEPA's model evaluation guidance (USEPA,  
60 2023, 2006). It should be noted that the purpose of the base model is not for the ozone State  
61 Implementation Plan (SIP) or ozone control, but to simulate the SBTEX concentrations using the  
62 RTRAC feature in the CAMx modeling system. Therefore, the ozone performance may not be as  
63 good as the ozone SIP modeling application over the nonattainment region, which is relatively  
64 smaller than our 4 km × 4 km domain. The base modeling is fairly performed well over the Gulf  
65 region states (Correlation Coefficient (R) ≥ 0.55). The ozone performances in Texas and Louisiana  
66 are close to the observed USEPA AQS stations (Texas: R = 0.79, NMB = 1%; Louisiana: R = 0.77,  
67 NMB = 11% ).

68 Additionally, because our base modeling shares the same simulation period as the Texas  
69 Commission on Environmental Quality (TCEQ) 2012 Ozone SIP modeling application (TCEQ,  
70 2016), we verified our modeling results with TCEQ's simulated OH radical-related model species,  
71 including ozone, NO<sub>2</sub>, and formaldehyde over the Dallas and Houston region. The detailed  
72 comparisons are shown in the supplementary documents (Fig. S1) and indicate that both modeling  
73 applications share a similar, good modeling performance. For Ozone, R is 0.75 in Dallas and 0.84  
74 in Houston; for NO<sub>2</sub>, R is 0.58 in Dallas and 0.76 in Houston; and for Formaldehyde, R is 0.74 in  
75 Dallas and 0.78 in Houston. While the model domains, meteorological input data, gridded hourly  
76 emission patterns, and CAMx model versions are different between these two applications, our  
77 results support our conducting the Reactive Tracer probing process with the base model.

### 78 **S3. Missing HAPs emission from np\_oilgas and ptnonipm**

#### 79 **S3.1 The Imputation HAPs Emission in Non-Point Oil and Gas Industry (np\_oilgas)**

80 Fig. S2 and Table S5 shows all adjusted emission of "np\_oilgas" (state total: 5803 t yr<sup>-1</sup>; model  
81 domain: 2912 t yr<sup>-1</sup>) are from Texas. Within this sector, increases in STEEX can be attributed to a  
82 specific SCC code. Table S6 shows details of emission behaviors emission in "np\_oilgas" for the  
83 imputation emission. The significant toluene increases are associated with tank condensate (729 t  
84 yr<sup>-1</sup>), crude oil loading (589 t yr<sup>-1</sup>), well dehydrator (581 t yr<sup>-1</sup>), oil well (115 t yr<sup>-1</sup>) and gas well  
85 (61 t yr<sup>-1</sup>) pneumatic devices in oil and gas exploration and production process. The xylenes

86 increases are from oil and gas production processes such as oil well artificial lift (such as beam  
87 pump) (2,062 t yr<sup>-1</sup>), produced water at oil well (426 t yr<sup>-1</sup>), hydraulic fracturing engines (91 t yr<sup>-1</sup>)  
88 <sup>1</sup>), and all processes at oil well (73 t yr<sup>-1</sup>). The ethylbenzene imputations are from crude petroleum  
89 oil well pneumatic devices (162 t yr<sup>-1</sup>), storage tanks (109 t yr<sup>-1</sup>), gas well dehydrators (53 t yr<sup>-1</sup>),  
90 on-shore oil well pneumatic pumps (34 t yr<sup>-1</sup>) and produced water at the well (28 t yr<sup>-1</sup>). The  
91 imputations of styrene in the "np\_oilgas" sector are relatively small (1.9 t yr<sup>-1</sup>), and most of them  
92 (69%) are from hydraulic fracturing engines. Other styrene are from engine combustion (0.47 t yr<sup>-1</sup>)  
93 <sup>1</sup>, 24%) and artificial lift (0.13 t yr<sup>-1</sup>, 0.4%).

94 Figure S2 shows the STEX-adjusted emission spatial distributions. In Fig. S2a, the largest toluene  
95 emission increase (19 t yr<sup>-1</sup>) occurred near the industry in Beaumont, which has many industrial  
96 storage tanks. The largest xylenes increase (Fig. S2b), 35 t yr<sup>-1</sup>, near Fort Worth city; the most  
97 significant ethylbenzene increase (Fig. S2c), 4 t yr<sup>-1</sup>, is near Longview; the largest styrene increase  
98 (Fig. S2d) 0.02 t yr<sup>-1</sup>, is located near Karnes, McMullen, Dewitt, and Live Oak County. Those  
99 STEX emissions happened in counties with many oil and gas industry storage or oil wells,  
100 reflecting the emission process patterns.

101 Figure S3a shows the temporal profile of "np\_oilgas" adjusted emission by hourly total over the  
102 modeling domain from May 1st to Sep 30<sup>th</sup>. The oil and gas industry adjust emission reflects the  
103 flat industrial emission pattern caused by oil well or VOC evaporation processes, and the daytime  
104 hour (L.T. 9:00 to L.T. 16:00) has a higher (~ 15%) emission rate than night-time, and during the  
105 day there was an increase of 10 tons hr<sup>-1</sup> compared to 65 tons hr<sup>-1</sup> at night. This pattern is caused  
106 by styrene emission from fracturing engines and other engine combustion for the oil and gas well  
107 operation. Further, xylene contributes about 50% of STEX, and toluene contributes about 40% of  
108 STEX. That increase shows that the adjusted HAPs emission inventory in "np\_oilgas" sector that  
109 relates to the oil well, storage tank, and the fracturing engine process is now being captured in  
110 adjusted inventory.

### 111 **S3.2 The Imputation HAPs Emission in Point Source Non-Electricity Generation Unit** 112 **(ptnonipm)**

113 Fig. S4 and Table S5 shows all adjusted STEX emission of the industrial point source emission  
114 sector: “ptnonipm” (six states total, including F.L., TX, LA, MS, GA, and AL: 2315 t yr<sup>-1</sup>; model  
115 domain total: 1,483 t yr<sup>-1</sup>). Adjusted STEX emissions of “ptnonipm” have nearly half of that  
116 increase from styrene (741 t yr<sup>-1</sup>) in Louisiana in the model domain.

117 Table S7 shows for "ptnonipm" that most of the styrene increases are from manufacturing  
118 processes of synthetic rubber dryers (374 t yr<sup>-1</sup>), manufacturing fiberglass (134 t yr<sup>-1</sup>), and  
119 polystyrene (130 t yr<sup>-1</sup>). For toluene, increased emissions were from manufacturing pesticides (105  
120 t yr<sup>-1</sup>), paint evaporation (48 t yr<sup>-1</sup>), landfill fugitive emission (23 t yr<sup>-1</sup>), and chemical  
121 manufacturing and evaporation. The xylenes imputations were from operating wastewater (33 t yr<sup>-1</sup>)  
122 <sup>1</sup>), water-base paint (29 t yr<sup>-1</sup>), solvent-based paint (22 t yr<sup>-1</sup>), coating (19 t yr<sup>-1</sup>), and sealing (18 t  
123 yr<sup>-1</sup>) in chemical evaporation processes. The ethylbenzene imputations were from the plastics  
124 production from the extruder (9 t yr<sup>-1</sup>), operating water-base paint (7 t yr<sup>-1</sup>), fugitive emission in  
125 chemical manufacturing (5 t yr<sup>-1</sup>), utilizing solvent-base paint (5 t yr<sup>-1</sup>), and wastewater treatment  
126 (4 t yr<sup>-1</sup>).

127 Figure S4 shows the spatial distribution of STEX imputed emission for "ptnonipm." In this figure,  
128 the toluene (Fig S4a) shows the most considerable emission difference (103 tons yr<sup>-1</sup>) happened  
129 near Baton Rouge, Louisiana. This adjusted emission in Baton Rouge is caused by producing  
130 pesticides. The most considerable xylenes difference (Fig. S4b), 21 t yr<sup>-1</sup>, happened near  
131 Montgomery, Alabama. This xylenes adjusted emission is caused by the building material industry  
132 (painting and sealing process) in the southwest of Montgomery. The largest ethylbenzene  
133 difference (Fig. S4c), 5 t yr<sup>-1</sup>, is at Birmingham, Alabama. This emission is near the steel industry.  
134 The largest styrene difference (Fig. S4d), 364 t yr<sup>-1</sup>, is near Lake Charles in Louisiana. This  
135 emission is caused by the polymer industry that produces synthetic rubber or other polymers.

136 Figure S3b shows a temporal profile of “ptnonipm” adjusted emission by hourly total over the  
137 modeling domain from May 1st to Sep 30<sup>th</sup>. The “ptnonipm” change emission reflects a relatively  
138 flat industrial emission pattern caused by polymer manufacturing or VOC evaporation. The  
139 daytime hour (L.T. 9:00 to L.T. 16:00) has a higher (~ 15%) emission rate than night-time, and  
140 during the day there was an increase of 3 tons hr<sup>-1</sup> compared to 19 tons hr<sup>-1</sup> at night. This pattern  
141 is caused by xylene emission from operating wastewater and paint evaporation. Further, styrene

142 contributes more than 50% of STEX, and toluene contributes about 25% of adjusted STEX. That  
143 increase shows that the adjusted HAPs emission inventory in the “ptnonipm” sector related to  
144 pesticide manufacturing, paint evaporation, building material industry, and steel industry, are now  
145 being captured in adjusted inventory for “ptnonipm”.

146 Other missing STEX emissions were found from the "pt\_oilgas" and "ptegu" sectors, but they were  
147 insignificant with a total emission of STEX of 185 t yr<sup>-1</sup>. (Figure S5, S6).

148  
149

150 **Tables:**

151

152 **Table S1.** The Annual emission rates (metric tons yr<sup>-1</sup>) of styrene, benzene, toluene,

153 ethylbenzene, and xylene (SBTEX) for the National Emission Inventory (Base)

| Emission Sectors <sup>#</sup>                                                 | Scenario | BENZENE<br>tons yr <sup>-1</sup> | TOLUENE<br>tons yr <sup>-1</sup> | XYLENES<br>tons yr <sup>-1</sup> | ETHYLBENZENE<br>tons yr <sup>-1</sup> | STYRENE<br>tons yr <sup>-1</sup> | Total<br>tons yr <sup>-1</sup> |
|-------------------------------------------------------------------------------|----------|----------------------------------|----------------------------------|----------------------------------|---------------------------------------|----------------------------------|--------------------------------|
| agriculture fire (agfire)                                                     | Base     | 1,128                            | 745                              | 0                                | 0                                     | 0                                | 1,873                          |
| commercial marine vehicle (cmv)                                               | Base     | 103                              | 16                               | 24                               | 10                                    | 11                               | 164                            |
| non-point source (nonpt)                                                      | Base     | 3,070                            | 16,932                           | 5,156                            | 1,188                                 | 777                              | 27,123                         |
| non-road vehicle (nonroad)                                                    | Base     | 4,752                            | 13,506                           | 14,265                           | 2,682                                 | 171                              | 35,376                         |
| on-road vehicle (onroad)                                                      | Base     | 10,495                           | <b>43,657</b>                    | <b>27,271</b>                    | <b>7,472</b>                          | 309                              | <b>89,204</b>                  |
| fire emission (ptfire)                                                        | Base     | <b>46,052</b>                    | 10,909                           | 4,355                            | 0                                     | 0                                | 61,316                         |
| rail road (rail)                                                              | Base     | 10                               | 14                               | 20                               | 8                                     | 9                                | 61                             |
| residential wood combustion (rwc)                                             | Base     | 395                              | 92                               | 26                               | 0                                     | 0                                | 513                            |
| non-point oil gas industry (np_oilgas)                                        | Base     | 5,421                            | 1,596                            | 3,097                            | 228                                   | 1                                | 10,343                         |
| electricity power plants unit (ptegu)                                         | Base     | 277                              | 129                              | 58                               | 34                                    | 7                                | 505                            |
| point source emission other than<br>electricity generation unit<br>(ptnonipm) | Base     | 7,305                            | 2,232                            | 2,351                            | 594                                   | <b>2,170</b>                     | 14,652                         |
| point source emission of oil and<br>gas industry (pt_oilgas)                  | Base     | 510                              | 252                              | 169                              | 29                                    | 1                                | 961                            |
| Total                                                                         | Base     | 79,518                           | 90,080                           | 56,792                           | 12,245                                | 3,456                            | 242,091                        |

154

155

156



157  
158  
159  
160  
161  
162

**Table S2.** The base CAMx model evaluation for ozone over modeling states: MB (mean bias), ME (mean error), RMSE (root mean square error), FB (fractional bias), FE (fractional error), NMB (normalized mean bias), NME (normalized mean error), and R (correlation coefficient).

| State (sites counts) | MB   | ME    | RMSE  | FB    | FE    | NMB   | NME   | R    |
|----------------------|------|-------|-------|-------|-------|-------|-------|------|
| Alabama (4)          | 7.6  | 12.43 | 16.09 | 28.09 | 52.33 | 27.03 | 44.19 | 0.67 |
| Florida (4)          | 7.27 | 11.37 | 15.07 | 24.44 | 35.93 | 22.47 | 35.14 | 0.55 |
| Louisiana (24)       | 2.93 | 9.99  | 12.85 | 4.26  | 53.34 | 10.92 | 37.27 | 0.77 |
| Mississippi (6)      | 8.92 | 11.97 | 15.15 | 30.99 | 39.52 | 27.87 | 37.4  | 0.67 |
| Texas (49)           | 0.3  | 8.85  | 12.08 | -3.05 | 45.98 | 1.02  | 30.4  | 0.79 |

163  
164  
165

166 **Table S3.** The physical parameters used in CAMx for reactive tracer modeling.

| No. | Model species name | Henry's law constants (M/atm) | T fact K | Molecular weight | Rscale |
|-----|--------------------|-------------------------------|----------|------------------|--------|
| 1   | TOLUENE            | 1.60E-01                      | 4000     | 92.14            | 1      |
| 2   | XYLENES            | 1.57E-01                      | 5633     | 106.1            | 1      |
| 3   | ETHYLBENZ          | 1.20E-01                      | 5100     | 106              | 1      |
| 4   | STYRENE            | 2.90E-01                      | 4800     | 104.1            | 1      |
| 5   | BENZENE            | 1.80E-01                      | 4000     | 78               | 1      |

167

168

169 **Table S4.** The chemical reaction parameters used in CAMx for reactive tracer modeling.

| Toxicants | Oxidants        | A (ppm <sup>-1</sup> min <sup>-1</sup> ) | Ea (K)    | B | T <sub>ref</sub> (K) |
|-----------|-----------------|------------------------------------------|-----------|---|----------------------|
| BENZENE   | OH              | 3.39E+03                                 | 1.90E+02  | 0 | 300                  |
| TOLUENE   | OH              | 2.66E+03                                 | -3.40E+02 | 0 | 300                  |
| XYLENES   | OH              | 2.41E+04                                 | 0.00E+00  | 0 | 300                  |
| XYLENES   | NO <sub>3</sub> | 5.27E-01                                 | 0.00E+00  | 0 | 300                  |
| ETHYLBENZ | OH              | 1.03E+04                                 | 0.00E+00  | 0 | 300                  |
| ETHYLBENZ | NO <sub>3</sub> | 1.77E-01                                 | 0.00E+00  | 0 | 300                  |
| STYRENE   | OH              | 8.56E+04                                 | 0.00E+00  | 0 | 300                  |
| STYRENE   | O <sub>3</sub>  | 2.51E-02                                 | 0.00E+00  | 0 | 300                  |
| STYRENE   | NO <sub>3</sub> | 2.21E+03                                 | 0.00E+00  | 0 | 300                  |

170

171

172 **Table S5.** The state total annual emissions (tons yr<sup>-1</sup>,) for the 2012 National Emission Inventory  
 173 (Base), and the emission scenario adjusted in this study (Adj).  
 174

| Sector                                                                  | Species      | Alabama |             | Florida |                 | Georgia |               | Louisiana |             | Mississippi |                | Texas |                  | Total by species |               | Sector Total |               |
|-------------------------------------------------------------------------|--------------|---------|-------------|---------|-----------------|---------|---------------|-----------|-------------|-------------|----------------|-------|------------------|------------------|---------------|--------------|---------------|
|                                                                         |              | Base    | Adj         | Base    | Adj             | Base    | Adj           | Base      | Adj         | Base        | Adj            | Base  | Adj              | Base             | Adj           | Base         | Adj           |
| electricity power plants unit (ptegu)                                   | toluene      | 24      | +2.2 (9%)   | 51      | +0.35 (0.7%)    | 13      | +0.34 (3%)    | 17        | +1.2 (7%)   | 10          | +0.007 (0.06%) | 70    | +3.6 (5%)        | 185              | +7.7 (4%)     | 535          | +13 (2%)      |
|                                                                         | xylenes      | 10      | +1.1 (11%)  | 26      | +0.16 (0.6%)    | 5.2     | +0.01 (0.2%)  | 11        | +0.48 (4%)  | 6.4         | +0.002 (0.03%) | 225   | +1.7 (1%)        | 283              | +3.5 (1%)     |              |               |
|                                                                         | styrene      | 4.7     | +0.001 (0%) | 5.8     | +0.0003 (0.01%) | 0.34    | +0.001 (0.4%) | 0.54      | +0.02 (3%)  | 0.32        | 0              | 5.8   | +0.03 (0.5%)     | 17               | +0.05 (0.3%)  |              |               |
|                                                                         | ethylbenzene | 5.7     | +0.55 (10%) | 14      | +0.08 (0.53%)   | 3.7     | +0.01 (0.3%)  | 4.6       | +0.29 (6%)  | 2.8         | +0.001 (0.03%) | 18    | +0.9 (5%)        | 49               | +1.8 (4%)     |              |               |
| point source emission of oil and gas industry (pt_oilgas)               | toluene      | 13      | +6.4 (48%)  | 2.5     | +0.69 (28%)     | 4.2     | +0.09 (2%)    | 27        | +43 (160%)  | 17          | +1.7 (10%)     | 183   | +45 (24%)        | 246              | +96 (39%)     | 437          | +172 (39%)    |
|                                                                         | xylenes      | 11      | +1.9 (17%)  | 1       | +0.87 (86%)     | 1.2     | +0.09 (7%)    | 14        | +30 (220%)  | 9.1         | +1.4 (15%)     | 107   | +29 (27%)        | 143              | +63 (44%)     |              |               |
|                                                                         | styrene      | 1.1     | +0.01 (1%)  | 0.04    | +0.007 (18%)    | 0.2     | 0             | 0.5       | +0.21 (44%) | 0.33        | +0.05 (14%)    | 5.2   | +0.009 (0.2%)    | 7.4              | +0.28 (4%)    |              |               |
|                                                                         | ethylbenzene | 3.2     | +0.55 (18%) | 0.40    | +0.07 (17%)     | 0.4     | +0.05 (12%)   | 4.7       | +5.7 (123%) | 3.6         | +0.49 (14%)    | 29    | +4.7 (16%)       | 41               | +12 (28%)     |              |               |
| point source emission other than electricity generation unit (ptnonipm) | toluene      | 304     | +51 (17%)   | 350     | +126 (36%)      | 425     | +167 (39%)    | 609       | +194 (32%)  | 253         | +48 (19%)      | 1,039 | +88 (8%)         | 2,979            | +674 (23%)    | 9,951        | +2,315 (23%)  |
|                                                                         | xylenes      | 705     | +84 (12%)   | 252     | +79 (31%)       | 70      | +146 (208%)   | 444       | +47 (11%)   | 344         | +39 (11%)      | 1,098 | +115 (10%)       | 2,914            | +510 (17%)    |              |               |
|                                                                         | styrene      | 433     | +24 (5%)    | 723     | +48 (7%)        | 341     | +122 (36%)    | 236       | +420 (178%) | 251         | +35 (14%)      | 1,298 | +362 (28%)       | 3,282            | +1,012 (31%)  |              |               |
|                                                                         | ethylbenzene | 85      | +12 (14%)   | 57      | +19 (34%)       | 115     | +26 (23%)     | 125       | +14 (11%)   | 79          | +15 (18%)      | 315   | +34 (10%)        | 776              | +119 (15%)    |              |               |
| non-point oil gas industry (np_oilgas)                                  | toluene      | 133     | 0           | 12      | 0               | 0       | 0             | 1041      | 0           | 118         | 0              | 19    | +2,371 (12,605%) | 1,322            | +2,371 (179%) | 4,253        | +5,803 (136%) |
|                                                                         | xylenes      | 209     | 0           | 5.9     | 0               | 0       | 0             | 2441      | 0           | 46          | 0              | 28    | +2,938 (10,339%) | 2,731            | +2,938 (108%) |              |               |
|                                                                         | styrene      | 0.08    | 0           | 0.0003  | 0               | 0       | 0             | 0.33      | 0           | 0.03        | 0              | 0.76  | +1.9 (251%)      | 1.2              | +1.9 (160%)   |              |               |
|                                                                         | ethylbenzene | 15      | 0           | 2       | 0               | 0       | 0             | 166       | 0           | 13          | 0              | 4.0   | +492 (12,423%)   | 200              | +492 (247%)   |              |               |
| State Total                                                             |              | 1,957   | +183 (9%)   | 1,501   | +275 (18%)      | 979     | 461 (47%)     | 5,141     | +756 (15%)  | 1,153       | +141 (12%)     | 4,445 | +6,487 (146%)    | 15,176           | +8,303 (55%)  | 15,176       | +8,303 (55%)  |

175

176

177  
178

**Table S6.** The “np oilgas” imputation STEEX emissions by SCC code

| Species      | SCC        | t yr <sup>-1</sup> | Contribution | SCC description                                                                                                                                        |
|--------------|------------|--------------------|--------------|--------------------------------------------------------------------------------------------------------------------------------------------------------|
| toluene      | 2310021010 | 729                | 30.8%        | Industrial Processes;Oil and Gas Exploration and Production;On-Shore Gas Production;Storage Tanks: Condensate                                          |
|              | 2310011201 | 589                | 24.8%        | Industrial Processes;Oil and Gas Exploration and Production;On-Shore Oil Production;Tank Truck/Railcar Loading: Crude Oil                              |
|              | 2310021400 | 581                | 24.5%        | Industrial Processes;Oil and Gas Exploration and Production;On-Shore Gas Production;Gas Well Dehydrators                                               |
|              | 2310010300 | 115                | 4.8%         | Industrial Processes;Oil and Gas Exploration and Production;Crude Petroleum;Oil Well Pneumatic Devices                                                 |
|              | 2310021300 | 61                 | 2.6%         | Industrial Processes;Oil and Gas Exploration and Production;On-Shore Gas Production;Gas Well Pneumatic Devices                                         |
| xylenes      | 2310000330 | 2,062              | 70.2%        | Industrial Processes;Oil and Gas Exploration and Production;All Processes;Artificial Lift                                                              |
|              | 2310000550 | 426                | 14.5%        | Industrial Processes;Oil and Gas Exploration and Production;All Processes;Produced Water                                                               |
|              | 2310000660 | 91                 | 3.1%         | Industrial Processes;Oil and Gas Exploration and Production;All Processes;Hydraulic Fracturing Engines                                                 |
|              | 2310010300 | 73                 | 2.5%         | Industrial Processes;Oil and Gas Exploration and Production;Crude Petroleum;Oil Well Pneumatic Devices                                                 |
|              | 2310011000 | 62                 | 2.1%         | Industrial Processes;Oil and Gas Exploration and Production;On-Shore Oil Production;Total: All Processes                                               |
| styrene      | 2310000660 | 1                  | 69.0%        | Industrial Processes;Oil and Gas Exploration and Production;All Processes;Hydraulic Fracturing Engines                                                 |
|              | 2310021302 | 0.47               | 24.0%        | Industrial Processes;Oil and Gas Exploration and Production;On-Shore Gas Production;Natural Gas Fired 4Cycle Rich Burn Compressor Engines 50 To 499 HP |
|              | 2310000330 | 0.13               | 6.6%         | Industrial Processes;Oil and Gas Exploration and Production;All Processes;Artificial Lift                                                              |
|              | 2310021202 | 0.01               | 0.4%         | Industrial Processes;Oil and Gas Exploration and Production;On-Shore Gas Production;Natural Gas Fired 4Cycle Lean Burn Compressor Engines 50 To 499 HP |
| ethylbenzene | 2310010300 | 162                | 33.0%        | Industrial Processes;Oil and Gas Exploration and Production;Crude Petroleum;Oil Well Pneumatic Devices                                                 |
|              | 2310021010 | 109                | 22.1%        | Industrial Processes;Oil and Gas Exploration and Production;On-Shore Gas Production;Storage Tanks: Condensate                                          |
|              | 2310021400 | 53                 | 10.8%        | Industrial Processes;Oil and Gas Exploration and Production;On-Shore Gas Production;Gas Well Dehydrators                                               |
|              | 2310111401 | 34                 | 7.0%         | Industrial Processes;Oil and Gas Exploration and Production;On-Shore Oil Exploration;Oil Well Pneumatic Pumps                                          |
|              | 2310000550 | 28                 | 5.8%         | Industrial Processes;Oil and Gas Exploration and Production;All Processes;Produced Water                                                               |

179  
180

181 **Table S7.** The “ptnonipm” imputation STEX emissions by SCC code

| Species      | SCC      | ton yr <sup>-1</sup> | Contribution | SCC description                                                                                                                                |
|--------------|----------|----------------------|--------------|------------------------------------------------------------------------------------------------------------------------------------------------|
| toluene      | 30102601 | 105                  | 15.1%        | Industrial Processes;Chemical Manufacturing;Pesticides;Other Not Classified                                                                    |
|              | 50100701 | 48                   | 7.0%         | Chemical Evaporation;Surface Coating Operations;Surface Coating Application - General;Paint: Solvent-base                                      |
|              | 30588801 | 23                   | 3.3%         | Waste Disposal;Solid Waste Disposal - Government;Landfill Dump;Fugitive Emissions                                                              |
|              | 50100402 | 21                   | 3.0%         | Industrial Processes;Petroleum Industry;Fugitive Emissions;Specify in Comments Field                                                           |
|              | 33000199 | 20                   | 2.9%         | Industrial Processes;Miscellaneous Manufacturing Industries;Miscellaneous Industrial Processes;Other Not Classified                            |
| xylenes      | 30700121 | 33                   | 6.2%         | Industrial Processes;Pulp and Paper and Wood Products;Sulfate (Kraft) Pulping;Wastewater: General                                              |
|              | 40200201 | 29                   | 5.5%         | Petroleum and Solvent Evaporation;Surface Coating Operations;Surface Coating Application - General;Paint: Water-base                           |
|              | 40200101 | 22                   | 4.2%         | Chemical Evaporation;Surface Coating Operations;Surface Coating Application - General;Paint: Solvent-base                                      |
|              | 40202501 | 19                   | 3.6%         | Chemical Evaporation;Surface Coating Operations;Miscellaneous Metal Parts;Coating Operation                                                    |
|              | 40201726 | 18                   | 3.4%         | Chemical Evaporation;Surface Coating Operations;Metal Can Coating;End Sealing Compound                                                         |
| styrene      | 30102609 | 374                  | 36.4%        | Industrial Processes;Chemical Manufacturing;Synthetic Rubber (Manufacturing Only);Dryers                                                       |
|              | 30501215 | 134                  | 13.0%        | Industrial Processes;Mineral Products;Fiberglass Manufacturing;Curing Oven (Textile-type Fiber)                                                |
|              | 30800901 | 130                  | 12.6%        | Industrial Processes;Rubber and Miscellaneous Plastics Products;Plastic Miscellaneous Products;Polystyrene: General                            |
|              | 30800730 | 65                   | 6.3%         | Industrial Processes;Rubber and Miscellaneous Plastics Products;Fiberglass Resin Products;Mechanical Resin Application: (non-vapor-suppressed) |
|              | 30101809 | 45                   | 4.4%         | Industrial Processes;Chemical Manufacturing;Plastics Production;Extruder                                                                       |
| ethylbenzene | 30101809 | 9                    | 7.3%         | Industrial Processes;Chemical Manufacturing;Plastics Production;Extruder                                                                       |
|              | 40200201 | 7                    | 6.0%         | Chemical Evaporation;Surface Coating Operations;Surface Coating Application - General;Paint: Water-base                                        |
|              | 30188801 | 5                    | 4.1%         | Industrial Processes;Chemical Manufacturing;Fugitive Emissions;General                                                                         |
|              | 40200101 | 5                    | 3.8%         | Chemical Evaporation;Surface Coating Operations;Surface Coating Application - General;Paint: Solvent-base                                      |
|              | 30600508 | 4                    | 3.2%         | Industrial Processes;Petroleum Industry;Wastewater Treatment;Oil/Water Separator                                                               |

182  
183

184 **Table S8.** The average concentration comparison between observational sites (Obs) and  
 185 adjustment case model result (Adj)  
 186

| Group    | Site ID   | FIPs  | Lat   | Lon    | benzene (ppb) |       | toluene (ppb) |       | xylenes (ppb) |       | ethylbenzene (ppb) |       | styrene (ppb) |       | SBTEX (ppb) |       |
|----------|-----------|-------|-------|--------|---------------|-------|---------------|-------|---------------|-------|--------------------|-------|---------------|-------|-------------|-------|
|          |           |       |       |        | Obs           | Adj   | Obs           | Adj   | Obs           | Adj   | Obs                | Adj   | Obs           | Adj   | Obs         | Adj   |
| Airport  | 481210034 | 48121 | 33.21 | -97.19 | 0.131         | 0.088 | 0.149         | 0.207 | 0.080         | 0.105 | 0.023              | 0.021 | 0.003         | 0.001 | 0.385       | 0.422 |
| Airport  | 481830001 | 48183 | 32.37 | -94.71 | 0.500         | 0.152 | 0.272         | 0.116 | 0.158         | 0.073 | 0.037              | 0.016 | 0.022         | 0.009 | 0.989       | 0.366 |
| Airport  | 483390078 | 48339 | 30.35 | -95.42 | 0.194         | 0.132 | 0.277         | 0.264 | 0.135         | 0.118 | 0.043              | 0.032 | 0.022         | 0.064 | 0.671       | 0.610 |
| Airport  | 484393009 | 48439 | 32.98 | -97.06 | 0.129         | 0.128 | 0.142         | 0.350 | 0.075         | 0.153 | 0.027              | 0.038 | 0.007         | 0.003 | 0.380       | 0.671 |
| Industry | 220050004 | 22005 | 30.22 | -90.96 | 0.355         | 0.395 | 0.289         | 0.321 | 0.165         | 0.101 | 0.049              | 0.033 | 0.032         | 0.031 | 0.890       | 0.881 |
| Industry | 220330009 | 22033 | 30.46 | -91.17 | 0.272         | 0.488 | 0.388         | 0.545 | 0.240         | 0.211 | 0.063              | 0.060 | 0.034         | 0.092 | 0.998       | 0.910 |
| Industry | 480391003 | 48039 | 29.01 | -95.39 | 0.161         | 0.122 | 0.172         | 0.099 | 0.087         | 0.046 | 0.027              | 0.012 | 0.006         | 0.007 | 0.452       | 0.285 |
| Industry | 481670005 | 48167 | 29.38 | -94.93 | 0.421         | 0.182 | 0.291         | 0.108 | 0.277         | 0.075 | 0.089              | 0.017 | 0.013         | 0.007 | 1.091       | 0.389 |
| Industry | 482010024 | 48201 | 29.9  | -95.32 | 0.270         | 0.248 | 0.373         | 0.648 | 0.314         | 0.255 | 0.091              | 0.067 | 0.027         | 0.048 | 1.075       | 1.266 |
| Industry | 482010036 | 48201 | 29.77 | -95.1  | 0.940         | 1.049 | 0.741         | 0.477 | 0.575         | 0.309 | 0.155              | 0.115 | 0.126         | 0.081 | 2.536       | 2.031 |
| Industry | 482010057 | 48201 | 29.73 | -95.23 | 1.248         | 0.820 | 0.739         | 0.762 | 0.462         | 0.343 | 0.155              | 0.101 | 0.055         | 0.142 | 2.661       | 2.168 |
| Industry | 482010058 | 48201 | 29.77 | -95.03 | 0.360         | 0.980 | 0.345         | 0.408 | 0.266         | 0.294 | 0.056              | 0.097 | 0.020         | 0.059 | 1.047       | 1.838 |
| Industry | 482010061 | 48201 | 29.61 | -95.01 | 0.461         | 0.260 | 0.323         | 0.182 | 0.164         | 0.090 | 0.067              | 0.024 | 0.055         | 0.013 | 1.070       | 0.570 |
| Industry | 482010069 | 48201 | 29.7  | -95.26 | 0.204         | 0.488 | 0.415         | 0.622 | 0.278         | 0.278 | 0.076              | 0.077 | 0.114         | 0.103 | 1.087       | 1.568 |
| Industry | 482010307 | 48201 | 29.71 | -95.25 | 0.334         | 0.531 | 0.469         | 0.698 | 0.412         | 0.310 | 0.124              | 0.086 | 0.099         | 0.116 | 1.438       | 1.742 |
| Industry | 482010617 | 48201 | 29.82 | -94.99 | 0.194         | 0.551 | 0.299         | 0.245 | 0.120         | 0.184 | 0.027              | 0.052 | 0.006         | 0.028 | 0.646       | 1.060 |
| Industry | 482010803 | 48201 | 29.76 | -95.17 | 0.284         | 0.811 | 0.882         | 0.514 | 0.304         | 0.260 | 0.062              | 0.089 | 0.052         | 0.070 | 1.583       | 1.744 |
| Industry | 482011015 | 48201 | 29.76 | -95.08 | 1.064         | 0.912 | 1.266         | 0.393 | 0.457         | 0.263 | 0.108              | 0.099 | 0.096         | 0.065 | 2.991       | 1.667 |
| Industry | 482011035 | 48201 | 29.73 | -95.25 | 0.252         | 0.579 | 0.498         | 0.666 | 0.338         | 0.299 | 0.080              | 0.086 | 0.059         | 0.100 | 1.228       | 1.730 |
| Industry | 482011039 | 48201 | 29.67 | -95.12 | 0.222         | 0.430 | 0.335         | 0.384 | 0.201         | 0.173 | 0.042              | 0.047 | 0.015         | 0.047 | 0.815       | 1.034 |
| Industry | 482011049 | 48201 | 29.71 | -95.22 | 0.420         | 0.671 | 0.569         | 0.760 | 0.341         | 0.341 | 0.108              | 0.095 | 0.023         | 0.151 | 1.462       | 2.019 |
| Industry | 482015504 | 48201 | 29.7  | -95.11 | 0.383         | 0.533 | 0.638         | 0.411 | 0.348         | 0.185 | 0.093              | 0.054 | 0.043         | 0.058 | 1.503       | 1.240 |
| Industry | 482016000 | 48201 | 29.68 | -95.25 | 0.232         | 0.370 | 0.529         | 0.553 | 0.397         | 0.244 | 0.088              | 0.064 | 0.033         | 0.089 | 1.280       | 1.319 |
| Industry | 482450009 | 48245 | 30.03 | -94.07 | 0.207         | 0.437 | 0.228         | 0.257 | 0.177         | 0.120 | 0.029              | 0.037 | 0.002         | 0.010 | 0.642       | 0.861 |
| Industry | 482450011 | 48245 | 29.89 | -93.99 | 0.558         | 0.333 | 0.240         | 0.105 | 0.227         | 0.050 | 0.052              | 0.017 | 0.007         | 0.014 | 1.084       | 0.452 |
| Industry | 482450014 | 48245 | 29.96 | -93.89 | 0.448         | 0.246 | 1.045         | 0.089 | 0.213         | 0.040 | 0.065              | 0.013 | 0.010         | 0.052 | 1.781       | 0.441 |
| Industry | 482450017 | 48245 | 29.98 | -93.95 | 0.335         | 0.373 | 0.214         | 0.170 | 0.175         | 0.081 | 0.056              | 0.032 | 0.090         | 0.078 | 0.870       | 0.734 |
| Industry | 482450018 | 48245 | 29.94 | -94    | 0.312         | 0.406 | 0.208         | 0.181 | 0.158         | 0.085 | 0.053              | 0.034 | 0.012         | 0.042 | 0.742       | 0.748 |
| Industry | 482450019 | 48245 | 29.89 | -93.97 | 0.393         | 0.483 | 0.206         | 0.142 | 0.152         | 0.060 | 0.054              | 0.021 | 0.012         | 0.020 | 0.817       | 0.726 |
| Industry | 482451035 | 48245 | 29.97 | -94.01 | 0.208         | 0.373 | 0.291         | 0.169 | 0.209         | 0.080 | 0.044              | 0.031 | 0.010         | 0.041 | 0.761       | 0.692 |
| Industry | 482451050 | 48245 | 30.06 | -94.09 | 0.315         | 0.548 | 0.276         | 0.343 | 0.250         | 0.156 | 0.074              | 0.046 | 0.014         | 0.010 | 0.929       | 1.103 |
| Rural    | 220330013 | 22033 | 30.7  | -91.05 | 0.168         | 0.135 | 0.124         | 0.158 | 0.065         | 0.065 | 0.025              | 0.019 | 0.026         | 0.007 | 0.409       | 0.385 |
| Rural    | 220470009 | 22047 | 30.22 | -91.31 | 0.184         | 0.175 | 0.200         | 0.135 | 0.119         | 0.045 | 0.033              | 0.014 | 0.020         | 0.012 | 0.556       | 0.382 |
| Rural    | 481211007 | 48121 | 33.04 | -97.13 | 0.082         | 0.088 | 0.199         | 0.250 | 0.081         | 0.114 | 0.012              | 0.026 | 0.001         | 0.002 | 0.375       | 0.480 |
| Rural    | 481390016 | 48139 | 32.48 | -97.02 | 0.102         | 0.074 | 0.102         | 0.125 | 0.056         | 0.064 | 0.020              | 0.014 | 0.003         | 0.002 | 0.282       | 0.279 |
| Rural    | 481391044 | 48139 | 32.17 | -96.87 | 0.110         | 0.043 | 0.095         | 0.064 | 0.056         | 0.027 | 0.020              | 0.008 | 0.008         | 0.001 | 0.290       | 0.142 |
| Rural    | 481671034 | 48167 | 29.25 | -94.86 | 0.121         | 0.070 | 0.098         | 0.047 | 0.035         | 0.026 | 0.018              | 0.006 | 0.000         | 0.001 | 0.273       | 0.151 |
| Rural    | 482010029 | 48201 | 30.03 | -95.67 | 0.217         | 0.104 | 0.223         | 0.320 | 0.130         | 0.129 | 0.041              | 0.034 | 0.011         | 0.004 | 0.622       | 0.590 |
| Rural    | 482030002 | 48203 | 32.66 | -94.16 | 0.279         | 0.100 | 0.197         | 0.084 | 0.102         | 0.077 | 0.025              | 0.013 | 0.037         | 0.002 | 0.640       | 0.276 |
| Rural    | 482311006 | 48231 | 33.15 | -96.11 | 0.123         | 0.042 | 0.122         | 0.077 | 0.062         | 0.032 | 0.023              | 0.009 | 0.004         | 0.001 | 0.333       | 0.160 |
| Rural    | 482511008 | 48251 | 32.46 | -97.16 | 0.113         | 0.061 | 0.109         | 0.109 | 0.049         | 0.069 | 0.023              | 0.012 | 0.005         | 0.001 | 0.298       | 0.252 |
| Rural    | 482570005 | 48257 | 32.56 | -96.31 | 0.110         | 0.042 | 0.077         | 0.081 | 0.038         | 0.034 | 0.016              | 0.009 | 0.000         | 0.001 | 0.242       | 0.167 |
| Urban    | 481130069 | 48113 | 32.82 | -96.86 | 0.081         | 0.168 | 0.239         | 0.521 | 0.332         | 0.217 | 0.054              | 0.058 | 0.003         | 0.005 | 0.708       | 0.969 |
| Urban    | 482010055 | 48201 | 29.69 | -95.49 | 0.178         | 0.200 | 0.213         | 0.706 | 0.157         | 0.275 | 0.048              | 0.072 | 0.011         | 0.006 | 0.606       | 1.260 |
| Urban    | 484391018 | 48439 | 32.72 | -97.1  | 0.144         | 0.119 | 0.288         | 0.364 | 0.128         | 0.191 | 0.028              | 0.041 | 0.033         | 0.005 | 0.620       | 0.721 |
| Urban    | 484391062 | 48439 | 32.65 | -97.2  | 0.087         | 0.107 | 0.225         | 0.343 | 0.086         | 0.194 | 0.022              | 0.035 | 0.014         | 0.005 | 0.434       | 0.685 |

187  
188

189  
190  
191

**Table S9**  
**(a)**

| Month | Correlation Coefficient (R) |         |         |              |      |       |
|-------|-----------------------------|---------|---------|--------------|------|-------|
|       | xylene                      | toluene | styrene | ethylbenzene | BENZ | SBTEX |
| 1     | 0.7                         | 0.59    | 0.73    | 0.71         | 0.52 | 0.73  |
| 2     | 0.71                        | 0.63    | 0.53    | 0.67         | 0.51 | 0.72  |
| 3     | 0.68                        | 0.71    | 0.69    | 0.66         | 0.47 | 0.81  |
| 4     | 0.58                        | 0.48    | 0.61    | 0.6          | 0.61 | 0.69  |
| 5     | 0.76                        | 0.62    | 0.54    | 0.83         | 0.68 | 0.84  |
| 6     | 0.73                        | 0.51    | 0.57    | 0.71         | 0.67 | 0.75  |
| 7     | 0.84                        | 0.62    | 0.6     | 0.8          | 0.68 | 0.79  |
| 8     | 0.66                        | 0.57    | 0.63    | 0.7          | 0.49 | 0.7   |
| 9     | 0.8                         | 0.65    | 0.59    | 0.8          | 0.56 | 0.81  |
| 10    | 0.74                        | 0.71    | 0.65    | 0.82         | 0.6  | 0.81  |
| 11    | 0.74                        | 0.53    | 0.72    | 0.8          | 0.79 | 0.77  |
| 12    | 0.67                        | 0.4     | 0.56    | 0.66         | 0.53 | 0.72  |

192  
193

**(b)**

| Month | Normalized Mean Bias (%) |         |         |              |       |        |
|-------|--------------------------|---------|---------|--------------|-------|--------|
|       | xylene                   | toluene | styrene | ethylbenzene | BENZ  | SBTEX  |
| 1     | -29.78                   | -3.85   | 135.07  | -25.12       | 59.29 | 10.94  |
| 2     | -19.24                   | 1.43    | 164.16  | -12.22       | 19.87 | 5.87   |
| 3     | -33.41                   | -13.15  | 163.16  | -26.86       | 21.59 | -3.99  |
| 4     | -44.24                   | -20.97  | 130.03  | -38.46       | 0.93  | -18.64 |
| 5     | -23.7                    | -0.43   | 93.02   | -15.97       | 45.77 | 10.71  |
| 6     | -24.86                   | -4.01   | 56.83   | -18.28       | 45.24 | 8.1    |
| 7     | -20.45                   | 5.53    | 105.34  | -7.84        | 55.7  | 12.98  |
| 8     | -33.62                   | -5.26   | 59.36   | -23.58       | 36.7  | 1.21   |
| 9     | -24.62                   | -4.12   | 37.66   | -14.55       | 32.96 | 3.99   |
| 10    | -34.47                   | -16.8   | 53.57   | -20.92       | 48.08 | -0.53  |
| 11    | -31.66                   | -22.23  | 64.58   | -14.05       | 28.85 | -7.69  |
| 12    | -31.73                   | -9.02   | 63.45   | -3.04        | 27.15 | 1.95   |

194

195 **Figures:**  
196

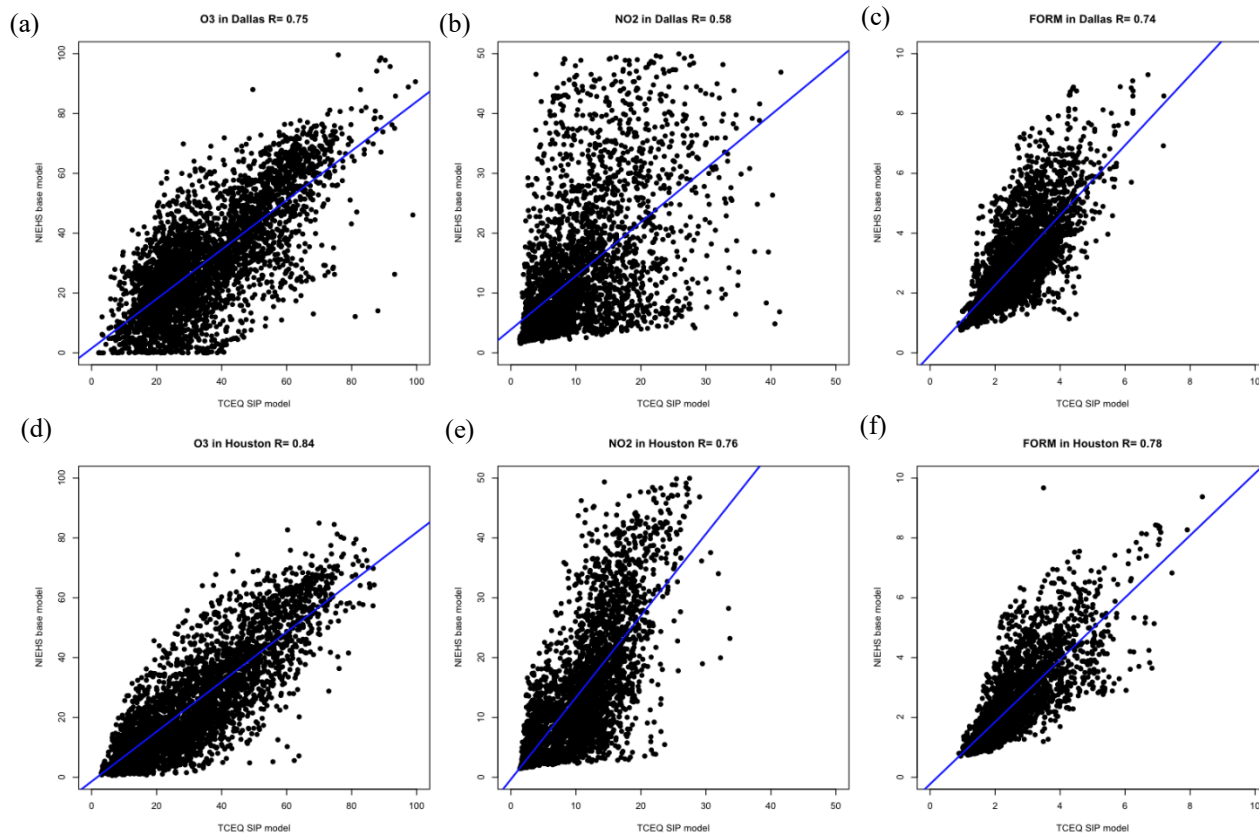

197  
198 **Figure S1.** The model result comparison between TCEQ Ozone SIP application and our NIEHS  
199 base model result: a) ozone, b) NO<sub>2</sub>, c) formaldehyde in Dallas, Texas; d) ozone, e) NO<sub>2</sub>, and f)  
200 formaldehyde in Houston, Texas.

201  
202



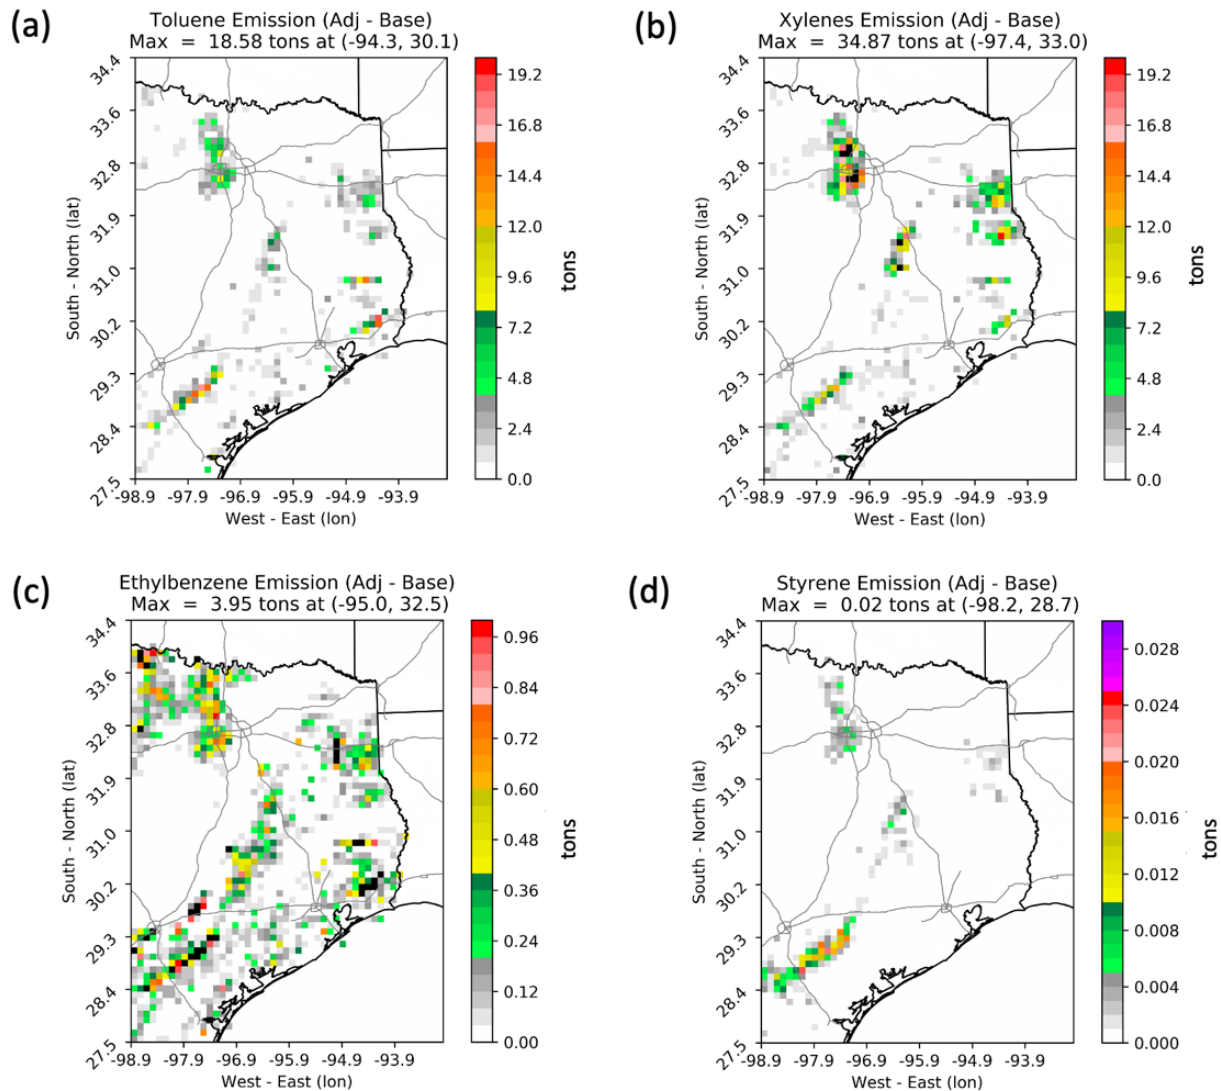

203  
204  
205  
206  
207  
208

**Figure S2.** For the non-point source oil and gas industry emission sector (np\_oilgas) the increase in annual emission rates for the 2012 Emission Inventory (Base), and the emission scenario adjusted in this study (Adj) of (a) toluene, (b) xylenes, (c) ethylbenzene, and (d) styrene

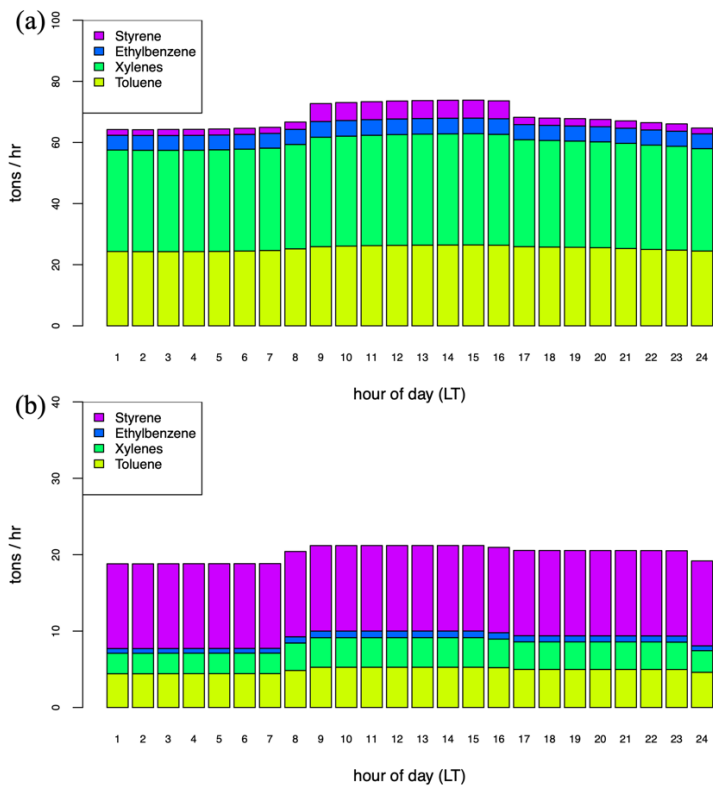

209  
 210 **Figure S3. (a)** For the “np\_oilgas” imputation emission (Adj - Base) from May 1<sup>st</sup> to September  
 211 30<sup>th</sup> over the entire 12×12 km model domain. The bars are the hourly total of styrene, toluene,  
 212 ethylbenzene, and xylenes (STEX) (tons hr<sup>-1</sup>), and **(b)** is for the “ptnonipm” imputation emission.  
 213

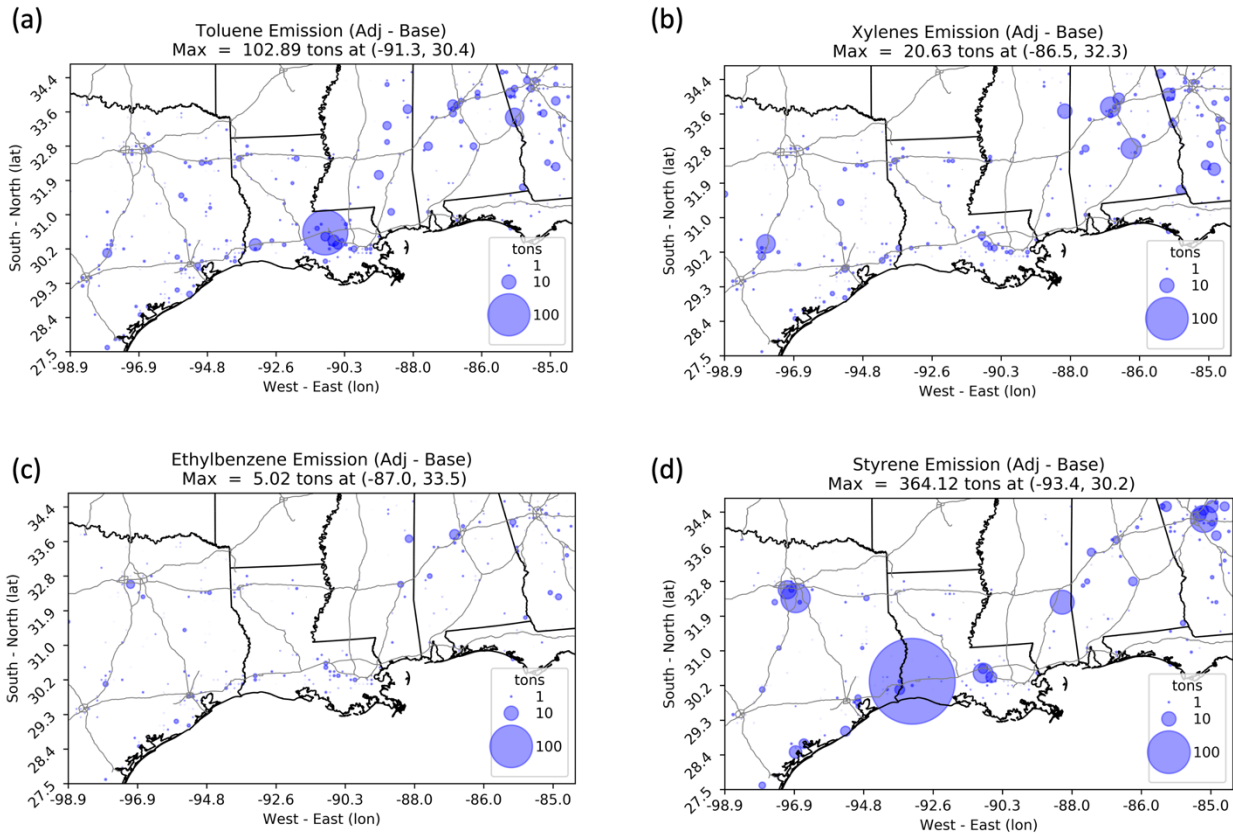

214  
 215  
 216  
 217  
 218  
 219  
 220  
 221

**Figure S4.** For the industry point source sector without electricity power plant emissions (ptnonipm) the increase in annual emission rates for the 2012 Emission Inventory (Base), and the emission scenario adjusted in this study (Adj) for (a) toluene, (b) xylenes, (c) ethylbenzene, and (d) styrene,

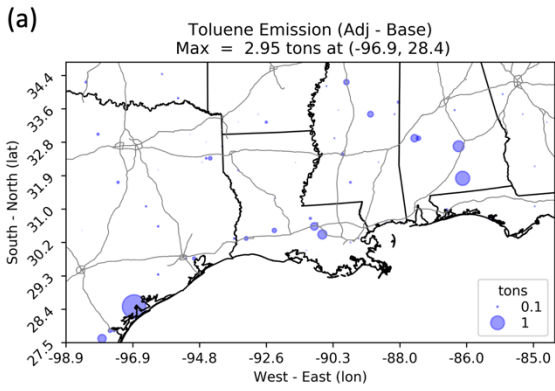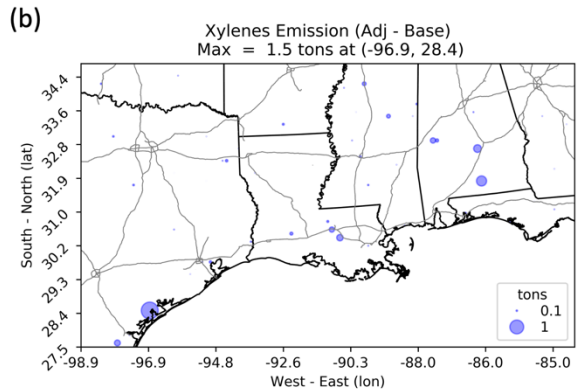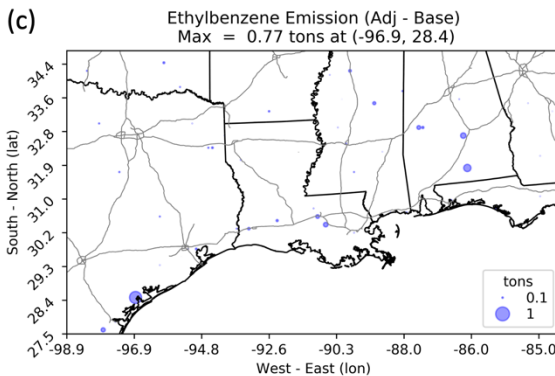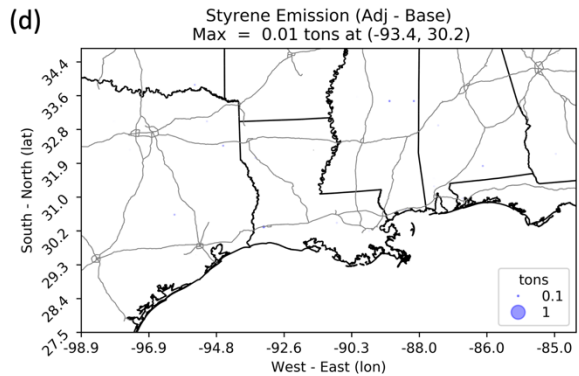

222  
223  
224  
225  
226

**Figure S5** Delta emission (Adj-Base) of (a) toluene, (b) xylenes, (c) ethylbenzene, and (d) styrene, in electricity generation power plant emission sector (ptegu)

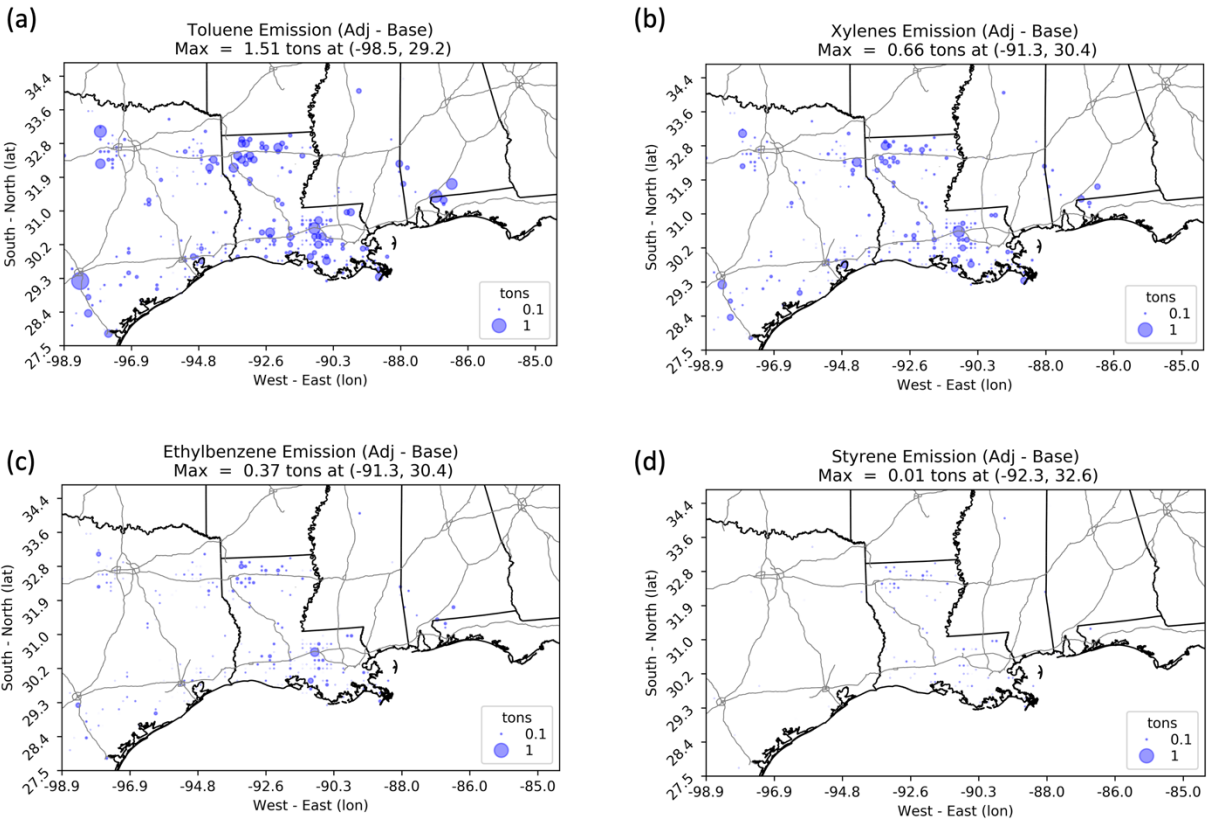

228  
229  
230  
231

**Figure S6** Delta emission (Adj-Base) of (a) toluene, (b) xylenes, (c) ethylbenzene, and (d) styrene, in point source oil and gas industry emission sector (pt\_oilgas)

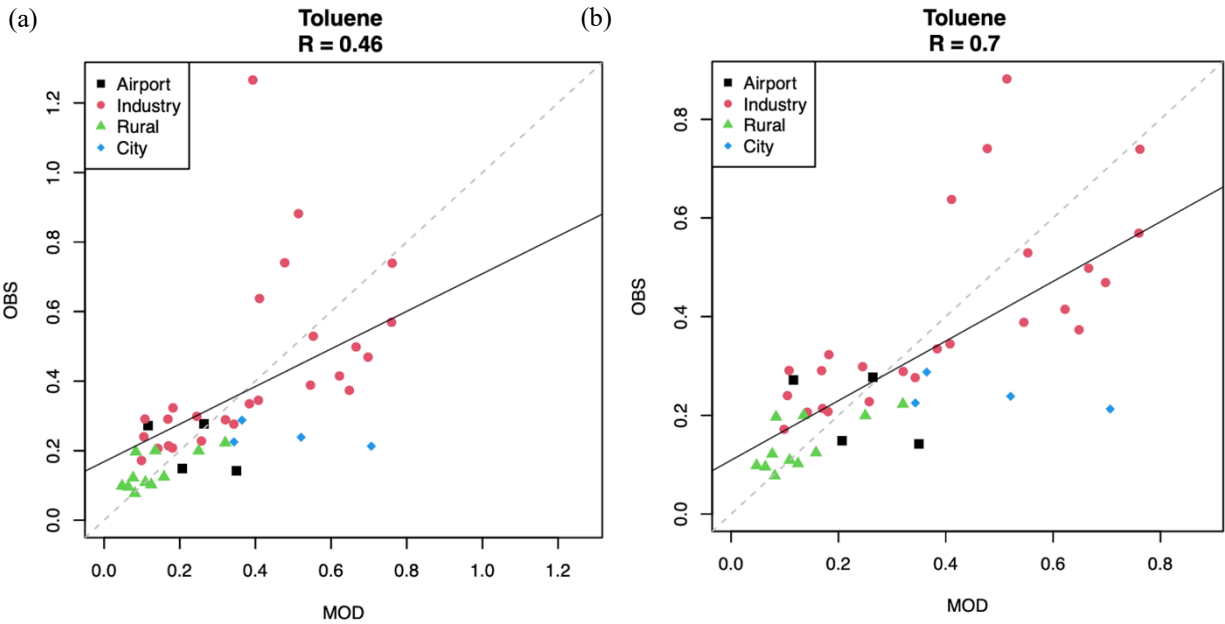

232  
233  
234  
235  
236

**Figure S7** The average toluene concentration (ppb) comparison between model and observational data. (a) is original, and (b) is after removing two sites (Site ID: 482011015 and 482450014) with a significant underestimate.

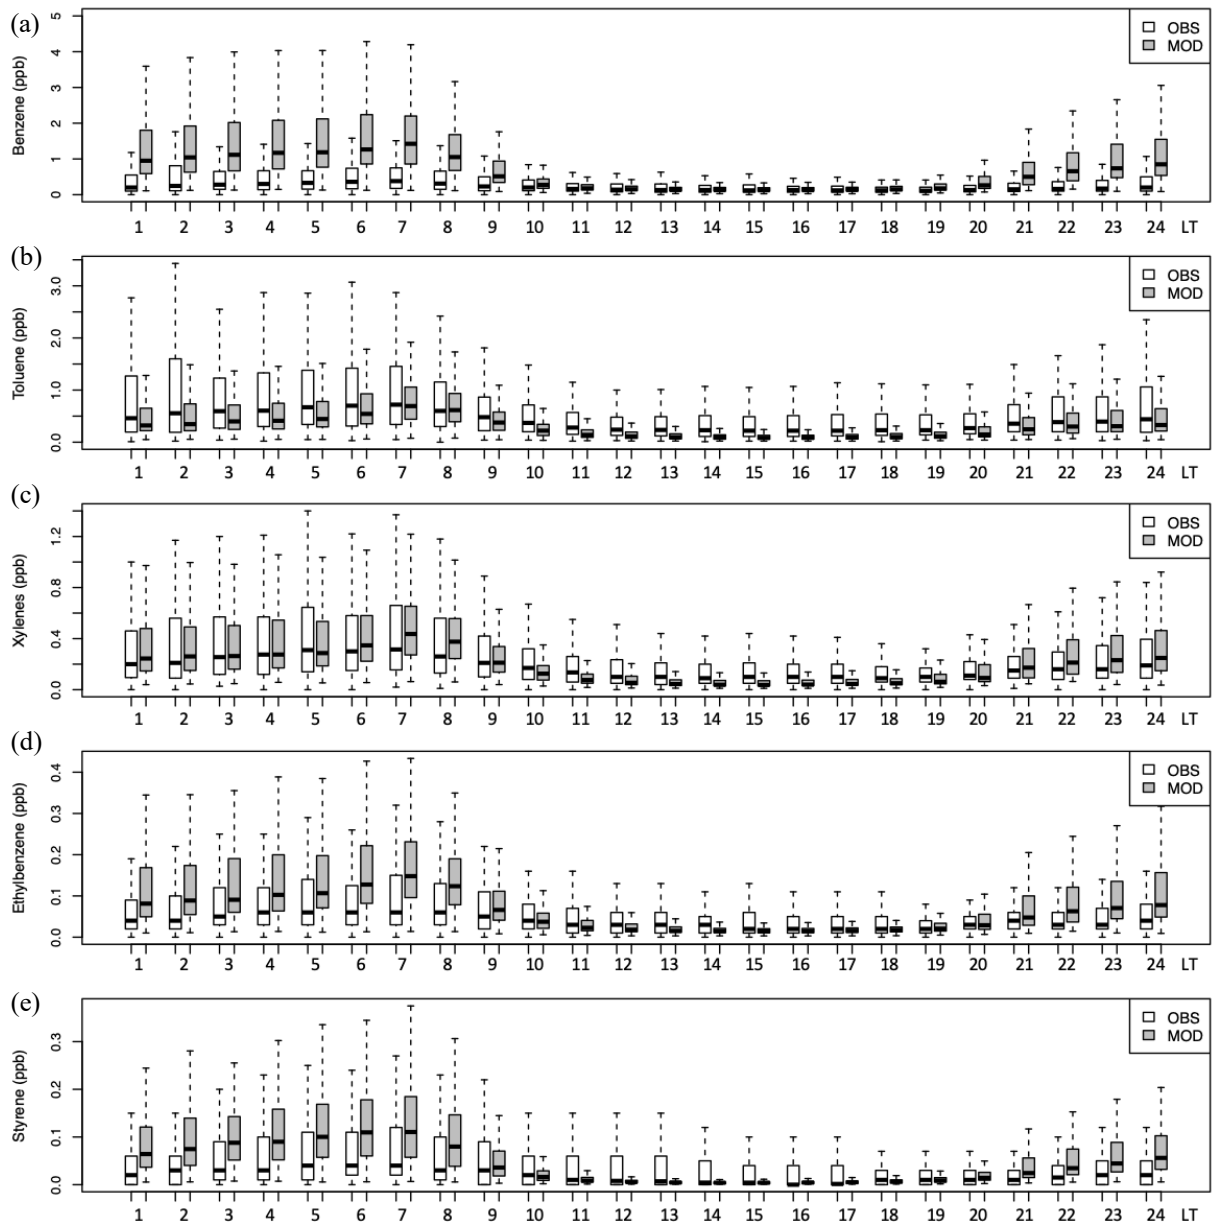

238

239

240

241

242

243

244

245

246

247

**Figure S8.** Diurnal pattern comparison of SBTEX in Houston (Site ID: 482010803, 482011015, 482010617) during the model simulation period (May 1<sup>st</sup>, 2012 to Sep 30<sup>th</sup>, 2012) for (a) benzene; (b) toluene; (c) xylenes; (d) ethylbenzene, and (e) styrene.

248 **Reference:**  
249  
250 Safety flare for burning combustible gas - has tangential inlet for non-flammable gas between  
251 housing and stack.

252 Hogrefe, C., Gilliam, R., Mathur, R., Henderson, B., Sarwar, G., Appel, K. W., Pouliot, G.,  
253 Willison, J., Miller<sup>2</sup>, R., Vukovich<sup>1</sup>, J., Eyth, A., Talgo, K., Allen, C., and Foley, K.:  
254 CMAQv5.3.2 ozone simulations over the Northern Hemisphere: model performance and  
255 sensitivity to model configuration  
256 Office of Research and Development, 2021.

257 NASA: OZONE & AIR QUALITY: <https://ozoneaq.gsfc.nasa.gov>, last 2021.

258 RAMBOLL: CAMx7.00 User's Guide: [https://camx-  
259 wp.azurewebsites.net/Files/CAMxUsersGuide\\_v7.00.pdf](https://camx-wp.azurewebsites.net/Files/CAMxUsersGuide_v7.00.pdf), last 2020a.

260 Ramboll: Speciation Tool User's Guide:  
261 [https://www.cmascenter.org/speciation\\_tool/documentation/5.0/Ramboll\\_sptool\\_users\\_guide\\_V  
262 5.pdf](https://www.cmascenter.org/speciation_tool/documentation/5.0/Ramboll_sptool_users_guide_V5.pdf), last 2020b.

263 Simon, H., Beck, L., Bhave, P. V., Divita, F., Hsu, Y., Luecken, D., Mobley, J. D., Pouliot, G.  
264 A., Reff, A., Sarwar, G., and Strum, M.: The development and uses of EPA's SPECIATE  
265 database, Atmospheric Pollution Research, 1, 196-206, 10.5094/apr.2010.026, 2010.

266 Steyn, D. G. and Rao, S. T.: Air Pollution Modeling and Its Application XX, Regional and  
267 intercontinental modelling, 2010.

268 TCEQ: TCEQ 2012 Modeling Platform Technical Support Document, [https://wayback.archive-  
269 it.org/414/20210529054550/https://www.tceq.texas.gov/assets/public/implementation/air/am/mo  
270 deling/gn/doc/TCEQ\\_2012\\_Modeling\\_Platform\\_TSD.pdf](https://wayback.archive-it.org/414/20210529054550/https://www.tceq.texas.gov/assets/public/implementation/air/am/modeling/gn/doc/TCEQ_2012_Modeling_Platform_TSD.pdf), 2016.

271 USEPA: Guidance on the Use of models and other analyses for demonstrating attainment of air  
272 quality goals for ozone, PM<sub>2.5</sub> and Regional Haze,  
273 [https://permanent.fdlp.gov/LPS74329/draft\\_final-pm-O3-RH.pdf](https://permanent.fdlp.gov/LPS74329/draft_final-pm-O3-RH.pdf), 2006.

274 USEPA: SPECIATE: <https://www.epa.gov/air-emissions-modeling/speciate>, last access: Aug 31,  
275 2023, 2021a.



276 USEPA: National Emissions Inventory (NEI) 2011 Version 6 Air Emissions Modeling Platform  
277 (EMP): <https://www.epa.gov/air-emissions-modeling/emissions-modeling-platforms>, last access:  
278 JAN, 27th, 2022, 2021b.

279 USEPA: EPA's report on the environment: <https://cfpub.epa.gov/roe/>, last access: Aug. 31, 2023,  
280 2023.

281 Yarwood, G. and Jung, J.: UPDATES TO THE CARBON BOND MECHANISM FOR  
282 VERSION 6 (CB6), 2010.  
283
